# Supplementary material for: Copper(ii) complex enhanced chemodynamic therapy through GSH depletion and autophagy flow blockade
Source: Royal Society of Chemistry journal article supplement (doi:10.1039/d2dt04108a), 2023-01-01
Supplement: d2dt04108a1.pdf [file d2dt04108a1.pdf]

## Supporting information

### **Copper(II) complex enhanced chemodynamic therapy through GSH depletion and autophagy flow blockade**

Wen-Ying Shen<sup>#a,b</sup>, Chun-Peng Jia<sup>#a</sup>, Li-Yi Liao<sup>a</sup>, Liu-Lin Chen<sup>a</sup>, Cheng-Cheng Yuan<sup>a</sup>, Yun-Qiong Gu<sup>a</sup>, Yang-Han Liu<sup>a</sup>, Hong Liang<sup>\*a</sup>, Zhen-Feng Chen<sup>\*a</sup>

<sup>a</sup>State Key Laboratory for Chemistry and Molecular Engineering of Medicinal Resources, Collaborative Innovation Center for Guangxi Ethnic Medicine, School of Chemistry and Pharmaceutical Sciences, Guangxi Normal University, Guilin 541004, P. R. China. E-mail: chen<sup>z</sup>f@gxnu.edu.cn (Z.-F. Chen); hliang@gxnu.edu.cn (H. Liang)

<sup>b</sup>Scientific Research Center, Guilin Medical University, Guilin, 541199, P. R. China

Table of Contents

**Pages 3-4** Materials and experimental procedures

**Pages 4-12** Structural characterization of all compounds

**Pages 12** UV-Vis spectra of **C1–C3**

**Pages 12** HPLC trace of **C1–C3**

**Pages 13-15**  $H^1$  NMR spectra of the reactions of **C1–C3** with GSH

**Pages 16** Crystal data of **C1–C3**

## **Materials and experimental procedures**

### **Materials**

Bax [E63], Bcl-2 [E17], DDIT-3 [9C8] (CHOP) antibodies were purchased from Abcam (Cambridge, UK). Phospho-eIF2 $\alpha$  (Ser51) (D9G8) antibody was purchased from Cell Signaling Technology (CA, USA). Phospho-PERK (Thr982) antibody was purchased from Invitrogen (CA, USA).

### **Experimental procedures**

#### **•OH determination by EPR**

Equal molar copper(II) complex and GSH were dissolved in DMF and distilled water, respectively. And they were mixed and reacted for 5 min at r. t.. H<sub>2</sub>O<sub>2</sub> and DMPO were added to the mixture. Subsequently, the mixture was diluted with distilled water, and H<sub>2</sub>O<sub>2</sub> and DMPO were added to detect •OH by Bruker A300 Spectrometer.

#### **Cytotoxic activity**

The cells were incubated for 48 h after dosing. MTT was added for 4-6 h. The upper liquid was poured out, DMSO was added, shaken for 5 min, and the absorbance at 570 and 490 nm was read. The growth inhibition was calculated as:  $(1 - OD_{\text{test}}/OD_{\text{control}}) \times 100\%$ .

#### **Intracellular GSH/GSSG ratio detection**

T24 cells were treated with C2 (18  $\mu$ M) for 48 h. Cells were collected and washed. The remaining steps of GSH and GSSG content detection were carried out according to the manufacturer's instructions. Both GSH and GSSG test kits were purchased from Solarbio (China). Finally, GSH/GSSG ratio was obtained by dividing GSH by GSSG.

## Cellular Ca<sup>2+</sup> detection

T24 cells were treated with C2 (12, 15, 18 μM), respectively. After 24 hours, cells were stained with Ca<sup>2+</sup> fluorescent dye Fura-3AM for 30 minutes. Subsequently, the treated cells were further washed with PBS, and the changes of cellular Ca<sup>2+</sup> were immediately detected by flow cytometry.

## Caspase-3/9 activity determination

T24 cells were treated with C2 (12, 15, 18 μM), respectively. After 24 hours, cells were collected and stained with FITC-DEVD-FMK (caspase-3) and FITC-LEHD-FMK (caspase-9) at 37 °C for at least 30 minutes. And flow cytometry was used to analyze the cells with activated caspase.

## Structural characterization of all compounds

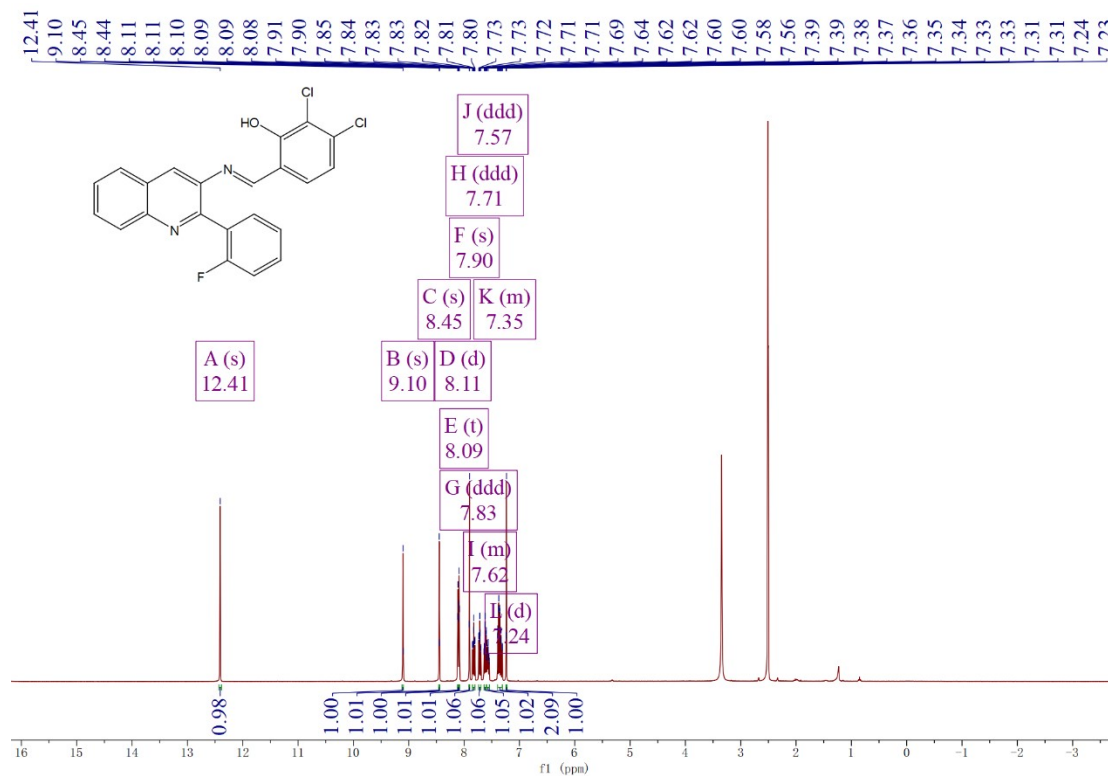

Figure S1. <sup>1</sup>H NMR (400MHZ, DMSO-*d*<sub>6</sub>) spectrum of L<sup>1</sup>

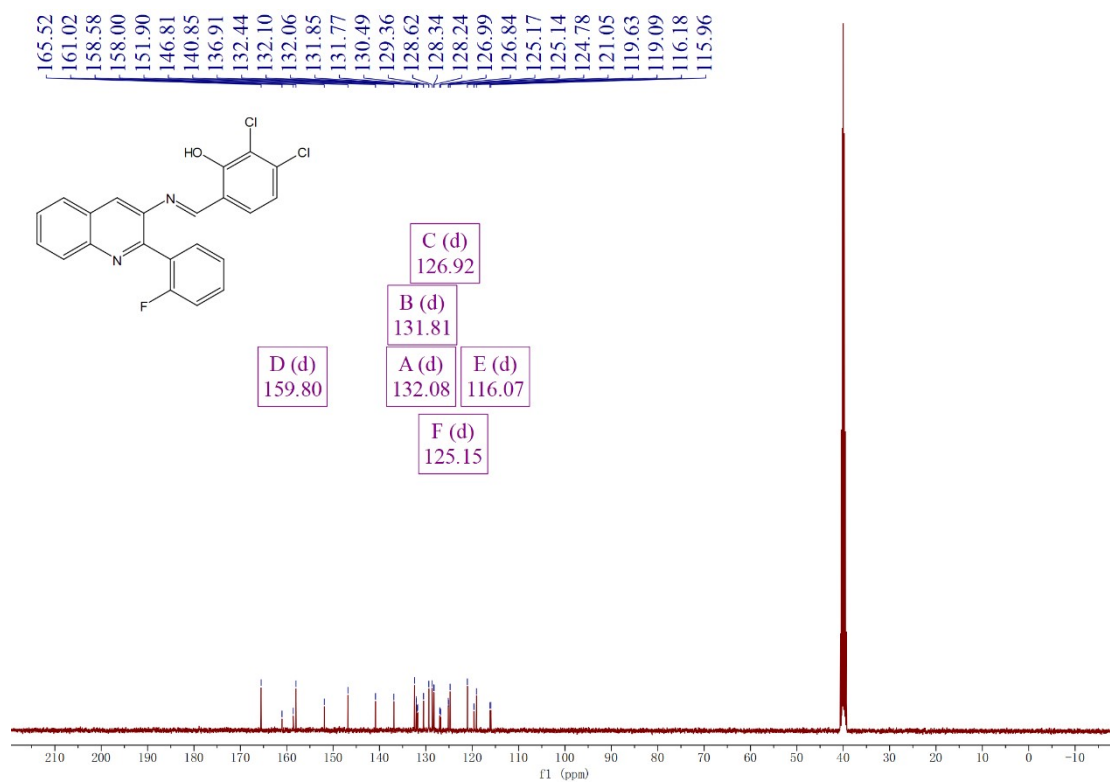

**Figure S2.** <sup>13</sup>C NMR (100MHZ, DMSO-*d*<sub>6</sub>) spectrum of **L<sup>1</sup>**

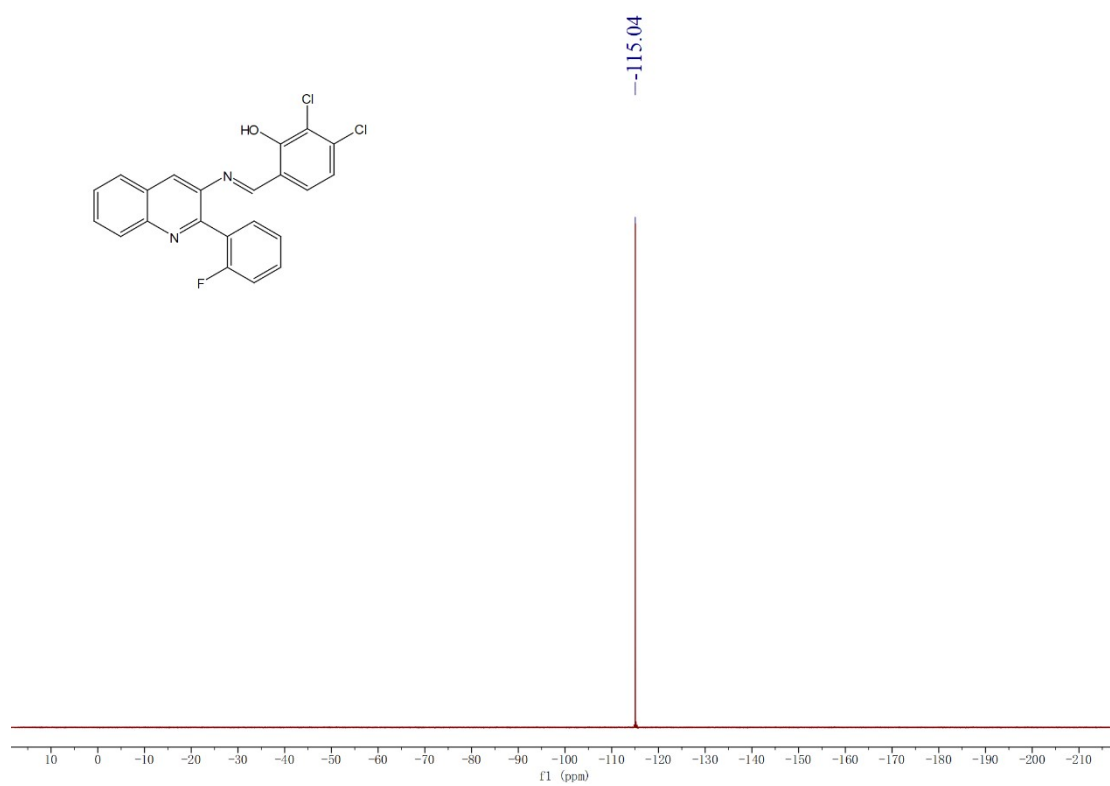

**Figure S3.** <sup>19</sup>F NMR (376MHZ, DMSO-*d*<sub>6</sub>) spectrum of **L<sup>1</sup>**

20201013-SWY-L26-3.4-2Cl-7 #24 RT: 0.08 AV: 1 NL: 1.48E6  
T: FTMS - p ESI Full ms [200.00-1000.00]

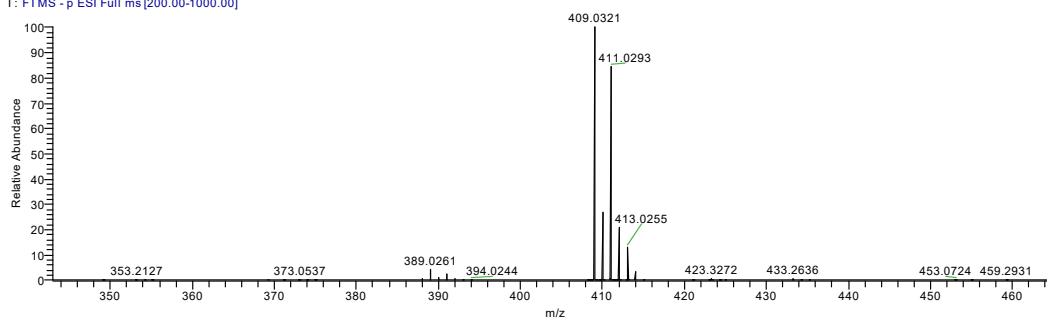

Figure S4. HRMS spectrum of L<sup>1</sup>

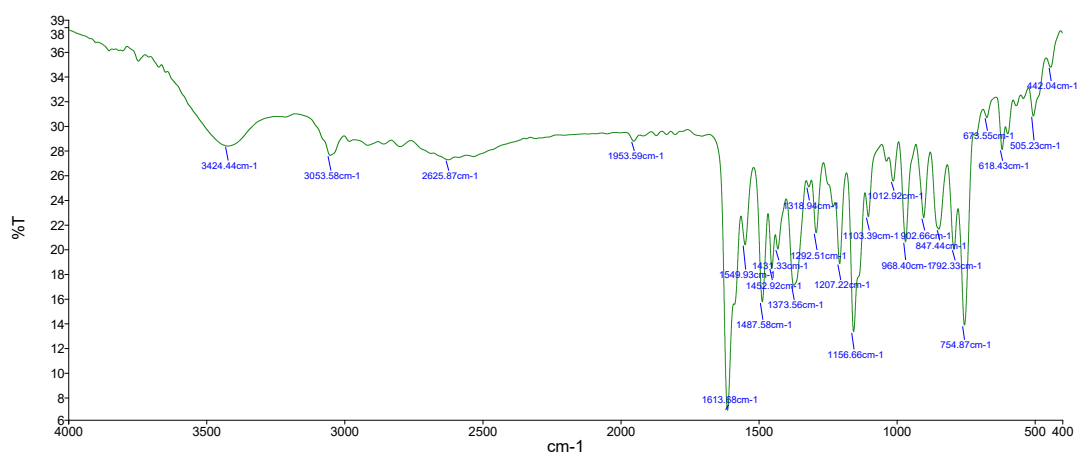

Figure S5. FT-IR spectrum of L<sup>1</sup>

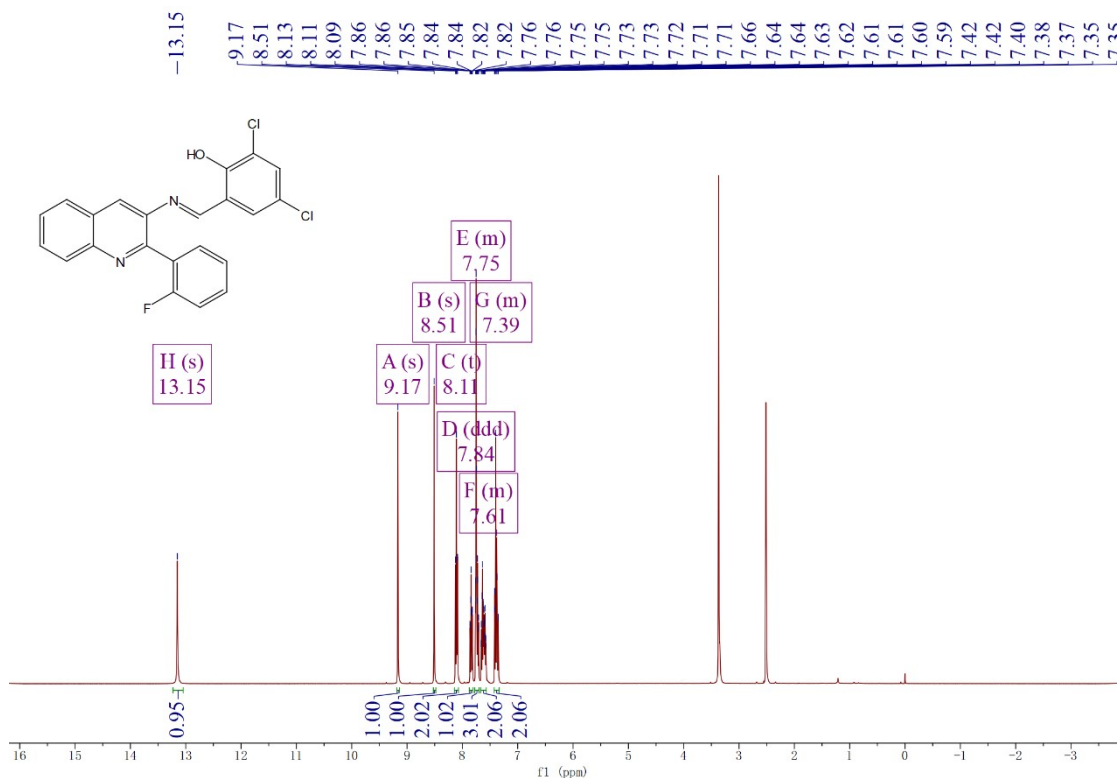

Figure S6. <sup>1</sup>H NMR (400MHZ, DMSO-*d*<sub>6</sub>) spectrum of L<sup>2</sup>

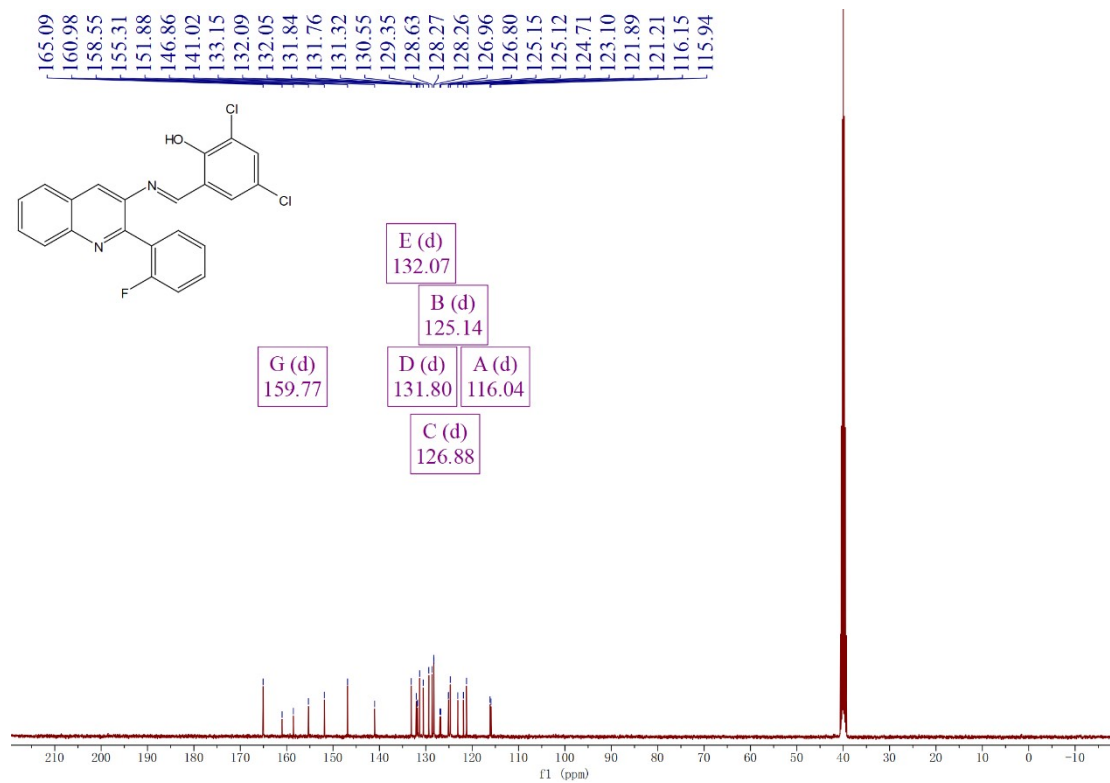

**Figure S7.** <sup>13</sup>C NMR (100MHz, DMSO-*d*<sub>6</sub>) spectrum of **L<sup>2</sup>**

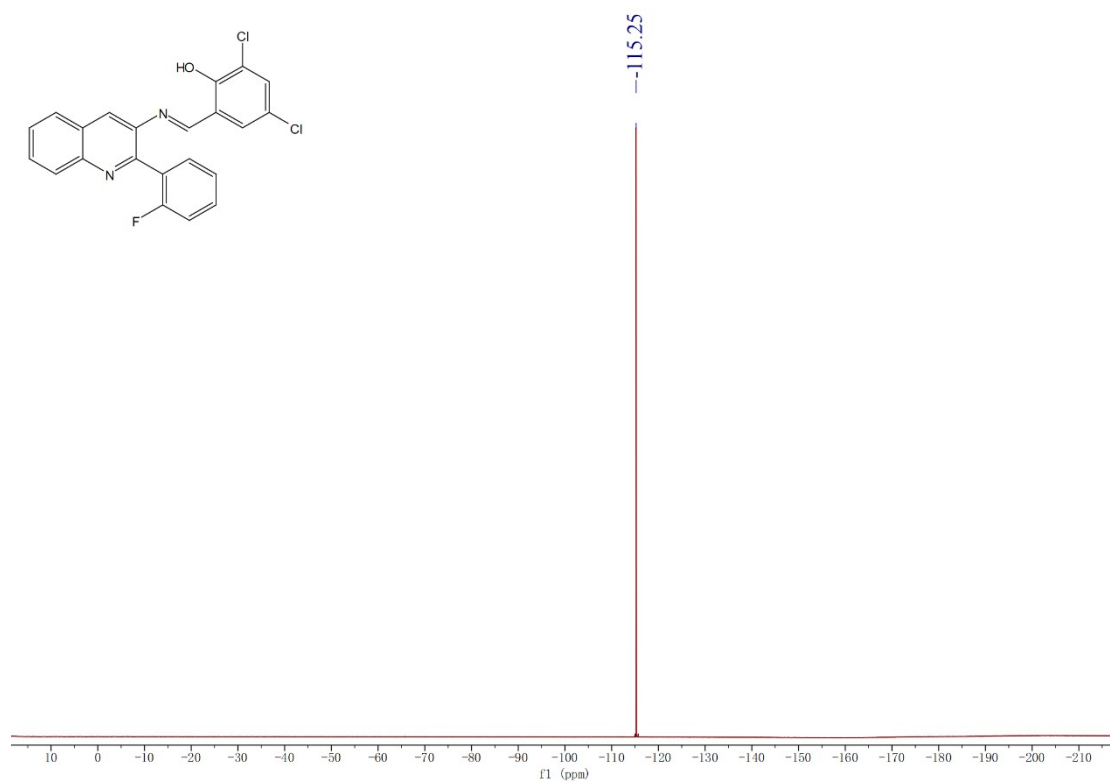

**Figure S8.** <sup>19</sup>F NMR (376MHz, DMSO-*d*<sub>6</sub>) spectrum of **L<sup>2</sup>**

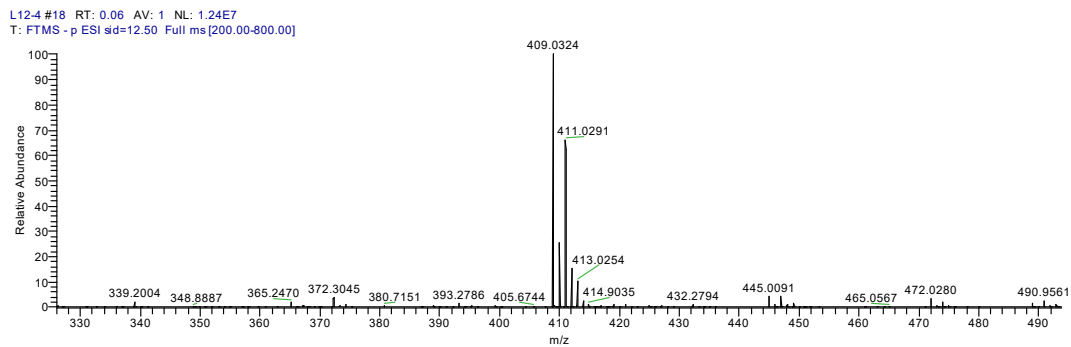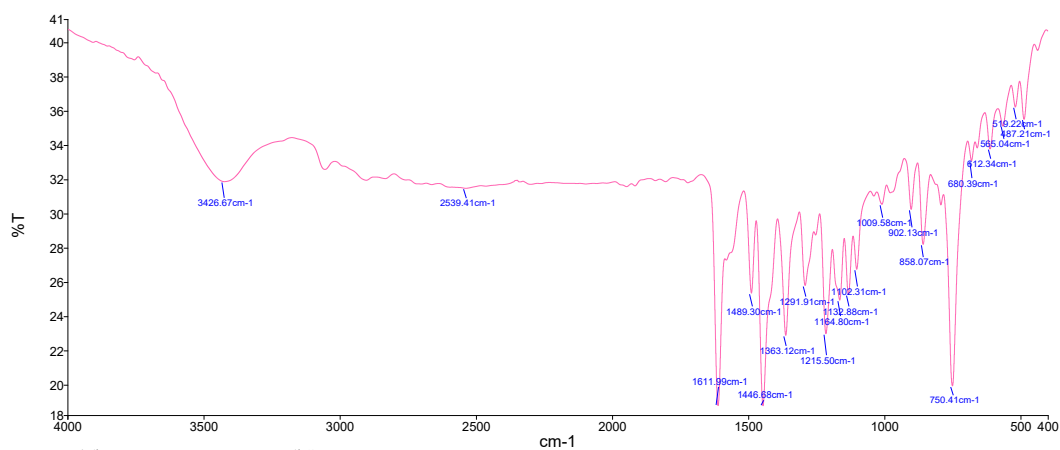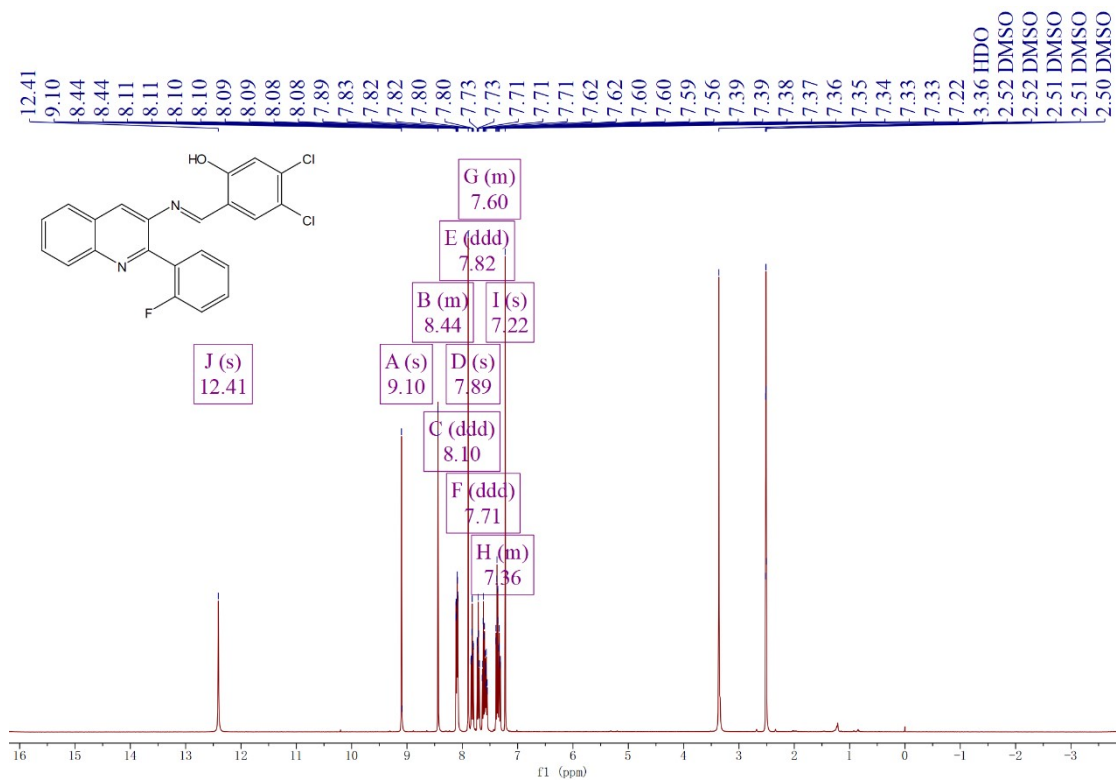



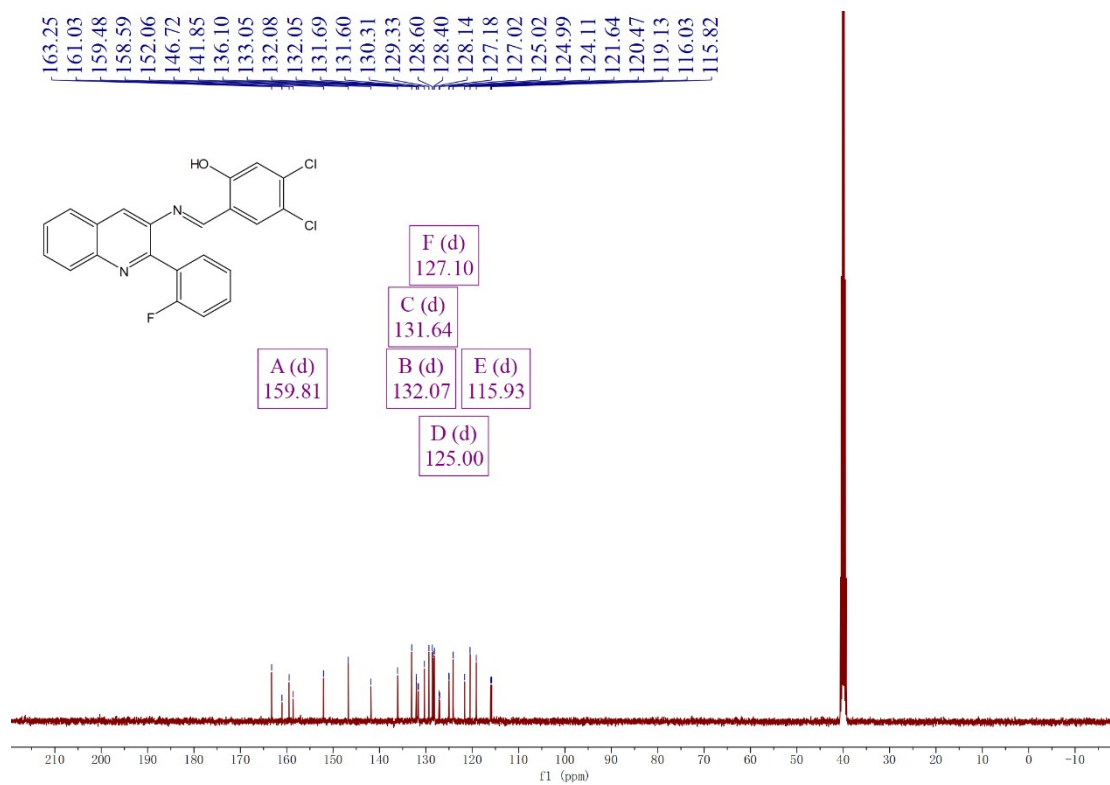

**Figure S12.**  $^{13}\text{C}$  NMR (100MHZ,  $\text{DMSO-}d_6$ ) spectrum of  $\text{L}^3$

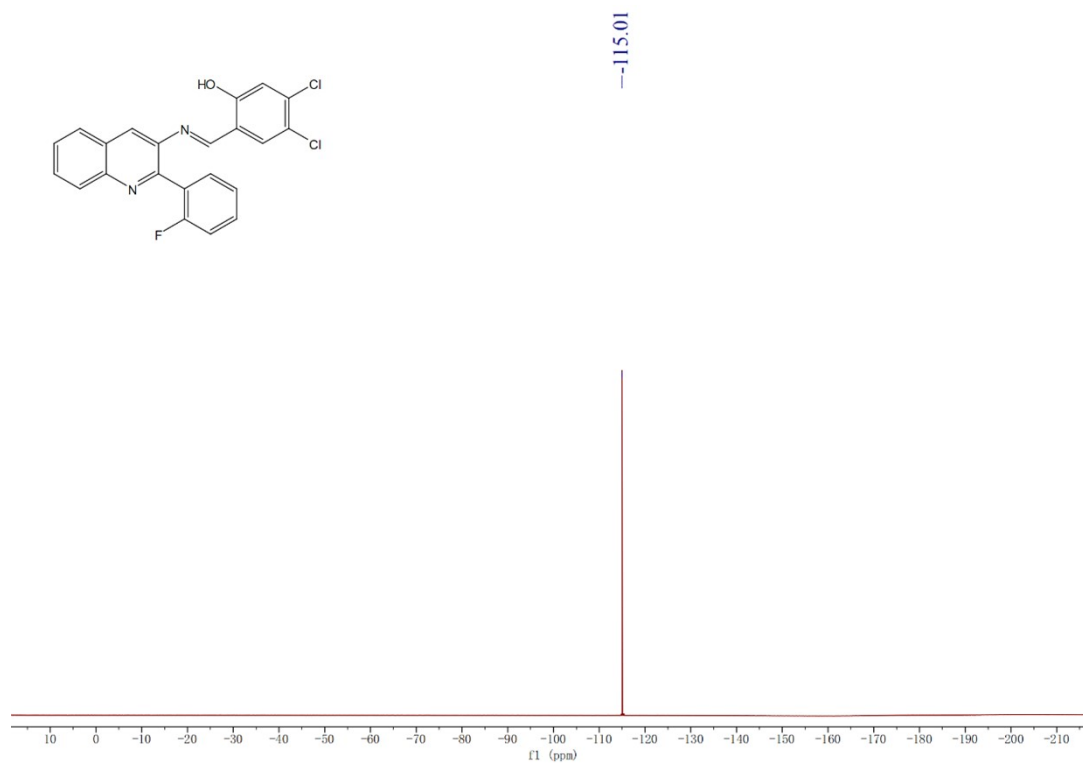

**Figure S13.**  $^{19}\text{F}$  NMR (376MHZ,  $\text{DMSO-}d_6$ ) spectrum of  $\text{L}^3$

20201013-SWY-L25-4.5-2Cl-5 #97 RT: 0.33 AV: 1 NL: 3.33E6  
T: FTMS - p ESI Full ms [200.00-1000.00]

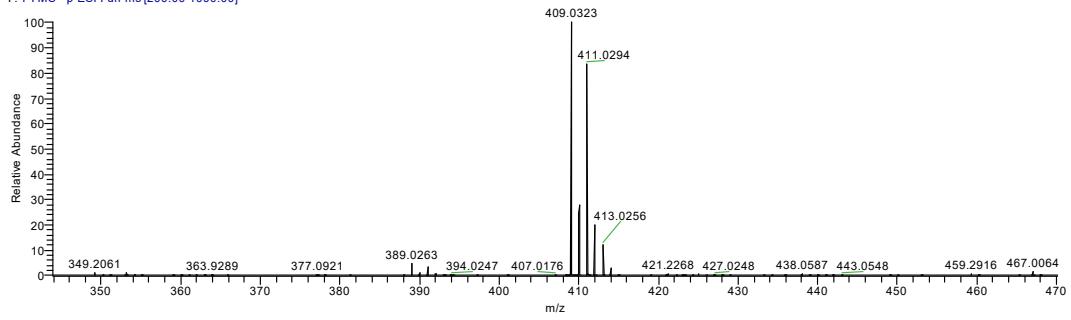

Figure S14. HRMS spectrum of L<sup>3</sup>

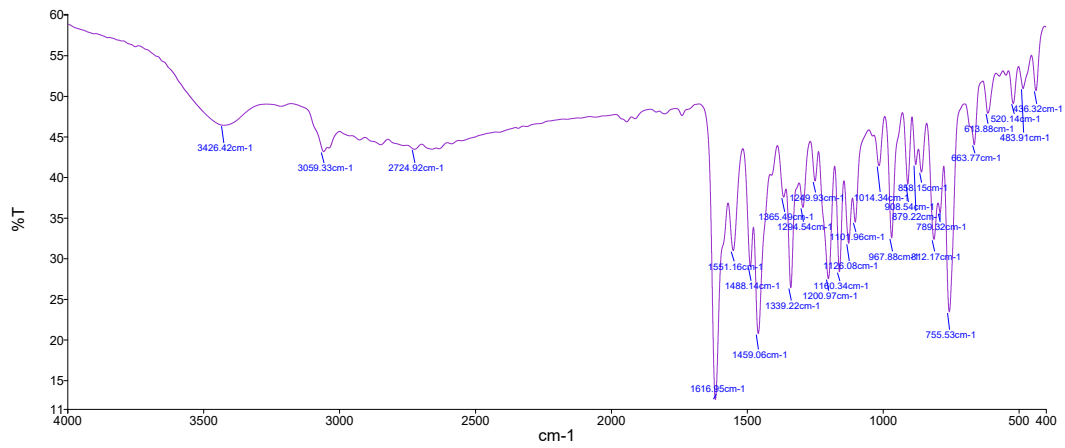

Figure S15. FT-IR spectrum of L<sup>3</sup>

20201113-SWY-L26-3.4-2Cl-Cu-1 #47-48 RT: 0.16-0.17 AV: 2 NL: 3.50E6  
T: FTMS - p ESI Full ms [200.00-1200.00]

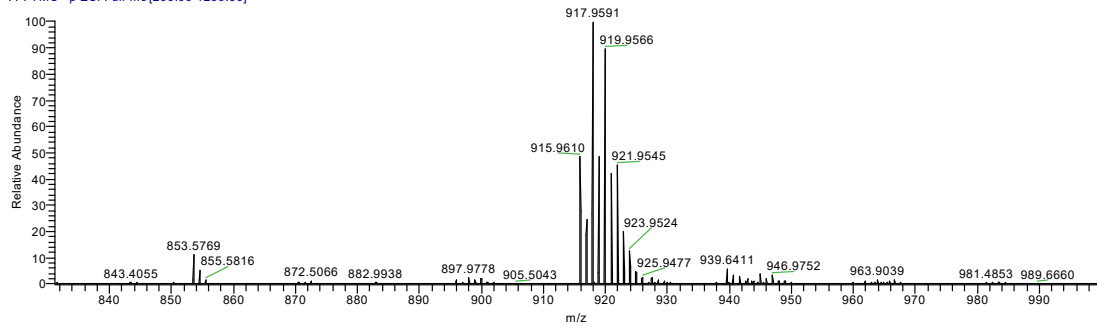

Figure S16. HRMS spectrum of C1

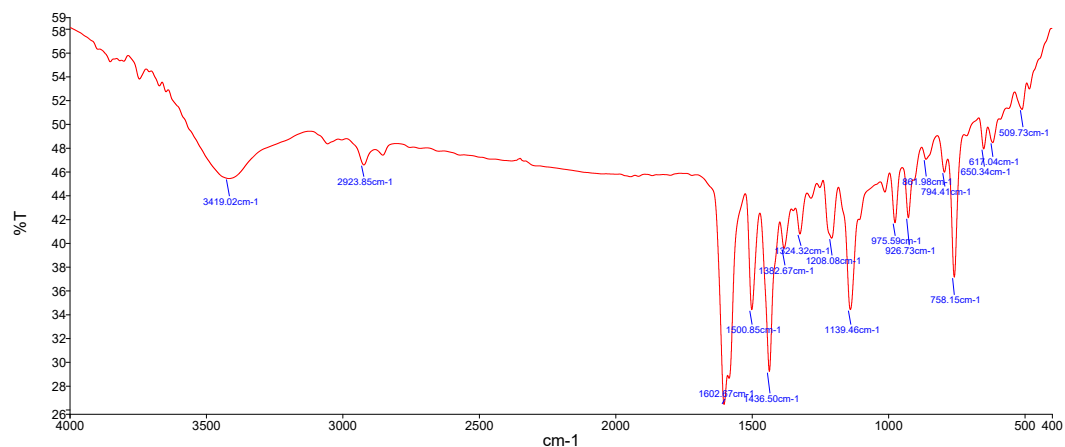

**Figure S17. FT-IR spectrum of C1**

L12(3.5-Cl)Cu #105 RT: 0.36 AV: 1 NL: 1.33E6  
 T: FTMS + p ESI sd=12.50 Full ms [710.00-1000.00]

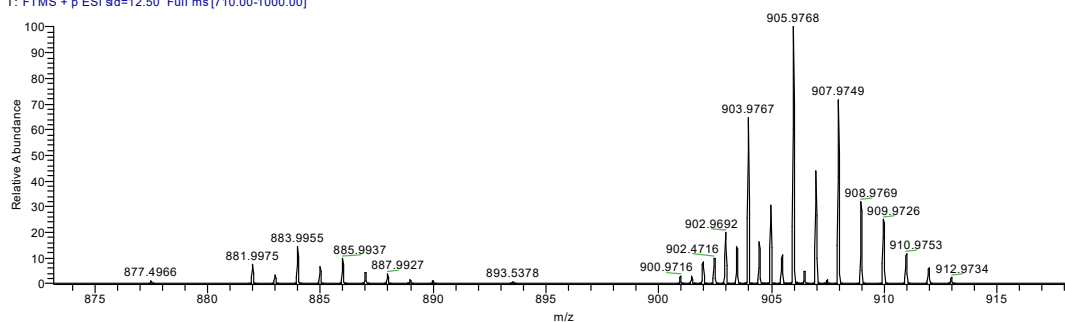

**Figure S18. HRMS spectrum of C2**

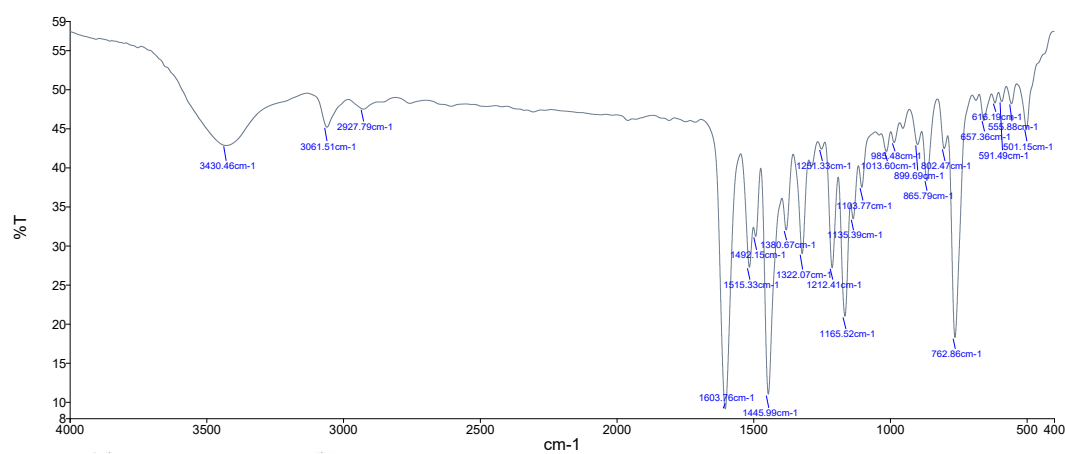

**Figure S19. FT-IR spectrum of C2**

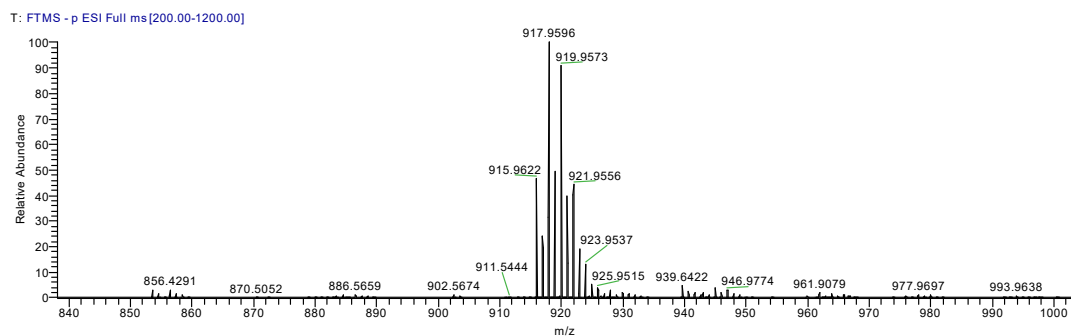

**Figure S20.** HRMS spectrum of C3

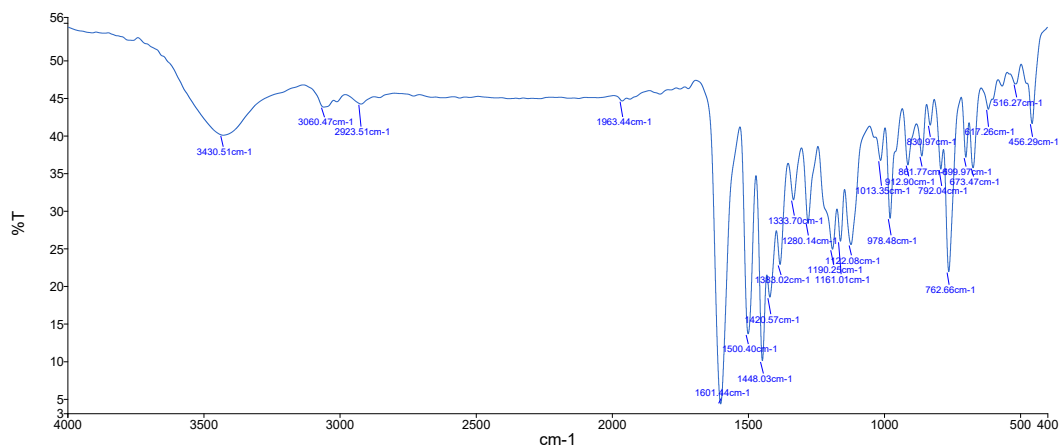

**Figure S21.** FT-IR spectrum of C3

### UV-Vis spectra of C1–C3

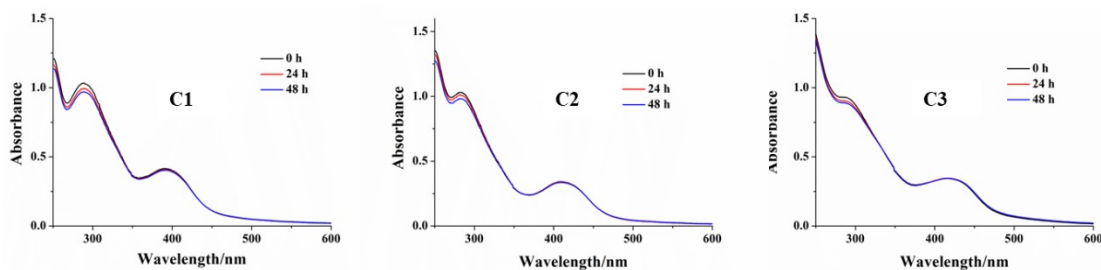

**Figure S22.** UV-Vis spectra of C1, C2 and C3 in PBS containing 1% DMF

### HPLC trace of C1–C3

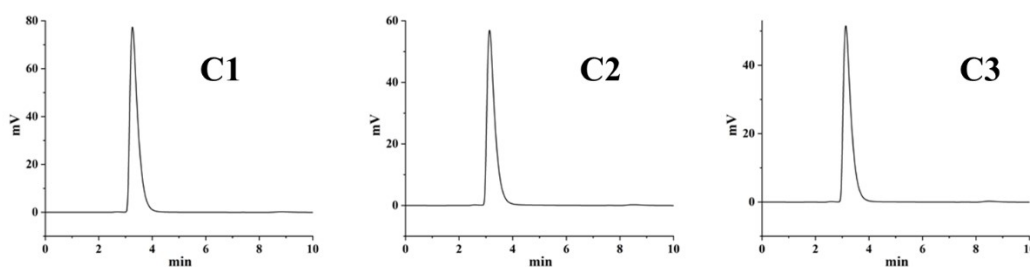

**Figure S23.** HPLC trace of C1, C2 and C3 in CH<sub>3</sub>OH containing 1% DMF

## $^1\text{H}$ NMR spectra of the reactions of C1–C3 with GSH

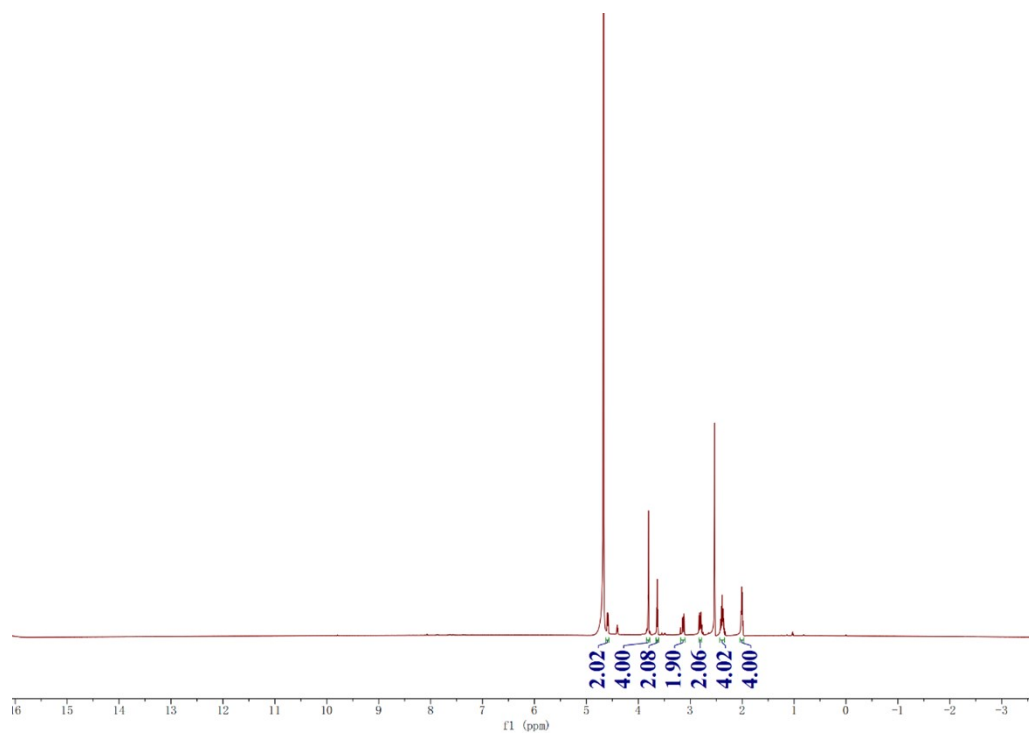

**Figure S24.**  $^1\text{H}$  NMR (600MHz) spectrum of the reaction of C1 with GSH (1:5 proportion of  $\text{DMSO-}d_6$  and  $\text{D}_2\text{O}$ ).

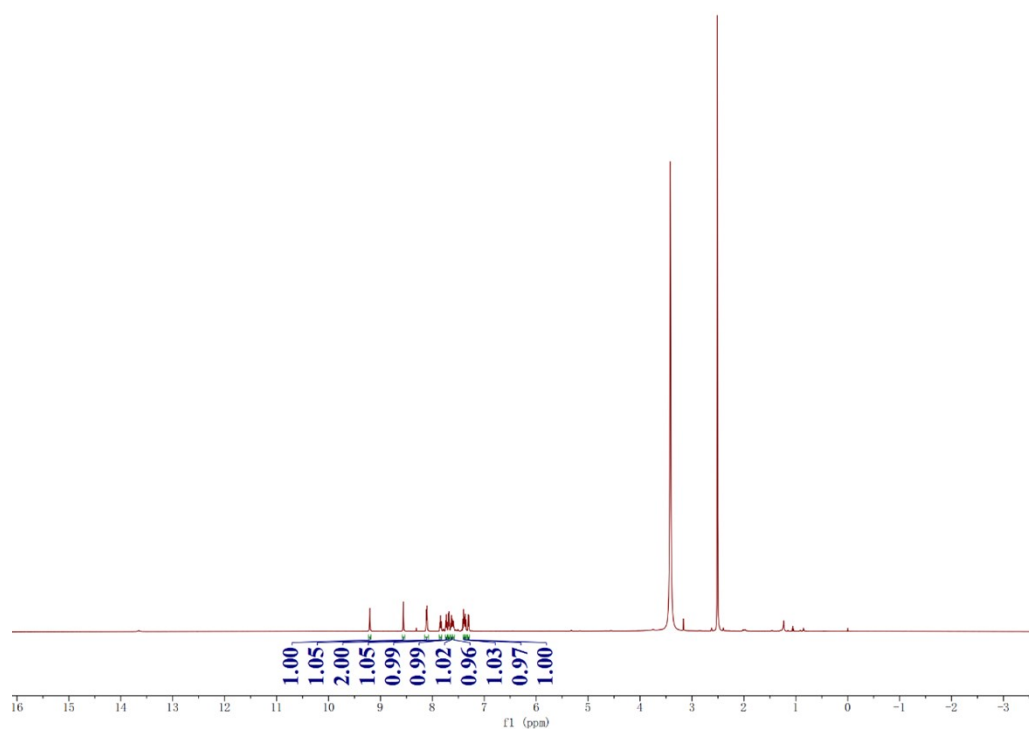

**Figure S25.**  $^1\text{H}$  NMR (600MHz) spectrum of the reaction of C1 with GSH (60:1 proportion of  $\text{DMSO-}d_6$  and  $\text{D}_2\text{O}$ ).

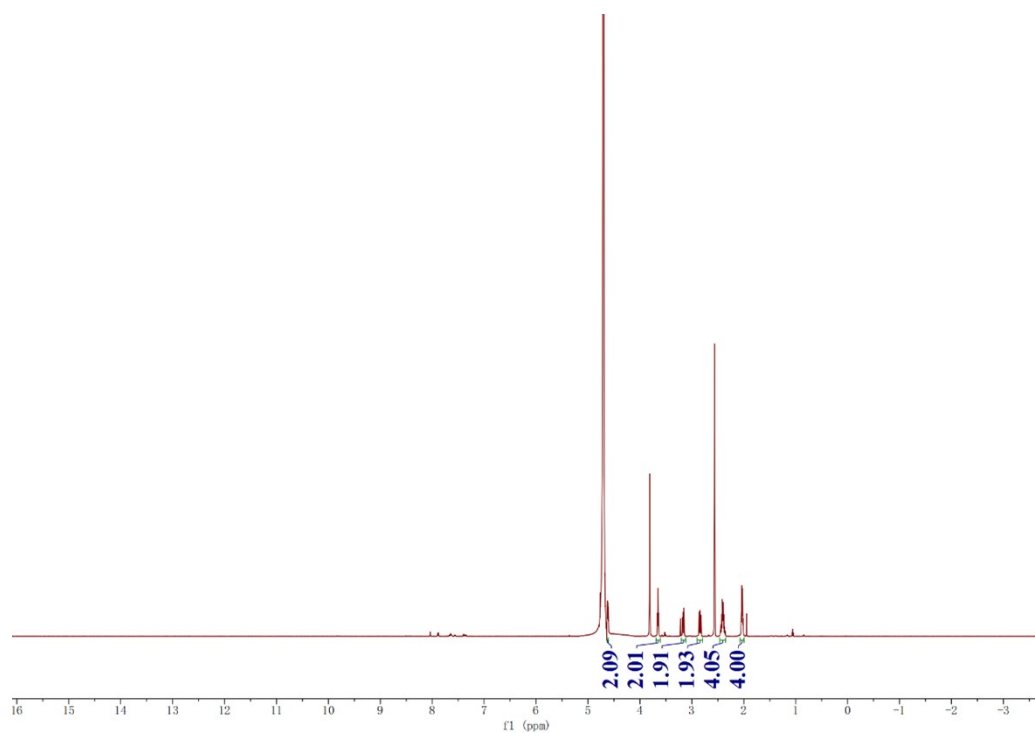

**Figure S26.** <sup>1</sup>H NMR (600MHz) spectrum of the reaction of **C2** with GSH (1:5 proportion of DMSO-*d*<sub>6</sub> and D<sub>2</sub>O).

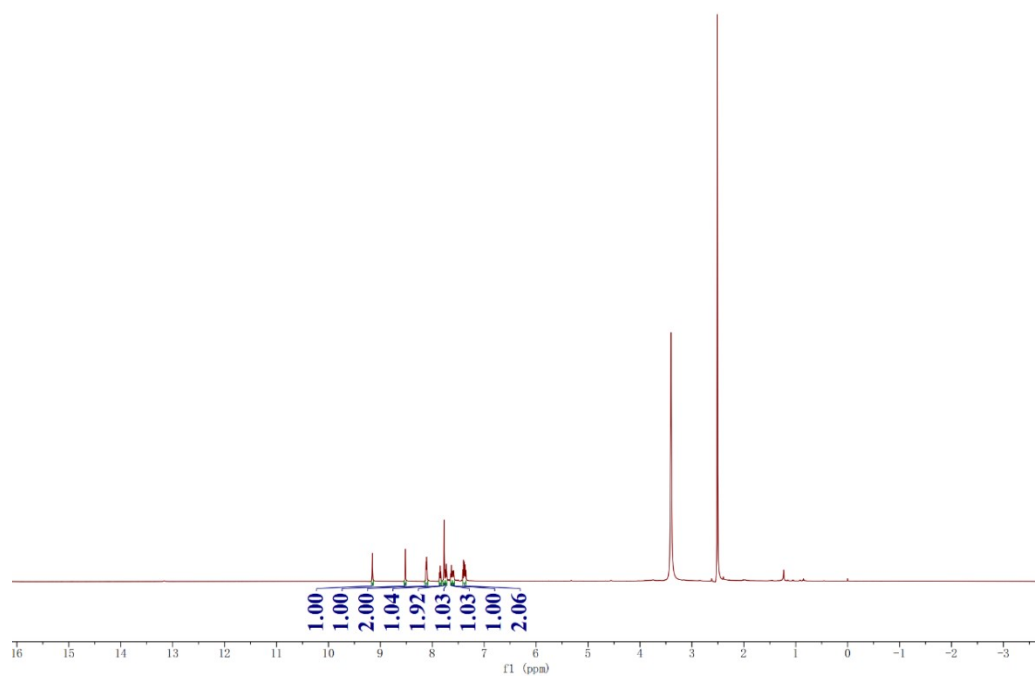

**Figure S27.** <sup>1</sup>H NMR (600MHz) spectrum of the reaction of **C2** with GSH (60:1 proportion of DMSO-*d*<sub>6</sub> and D<sub>2</sub>O).

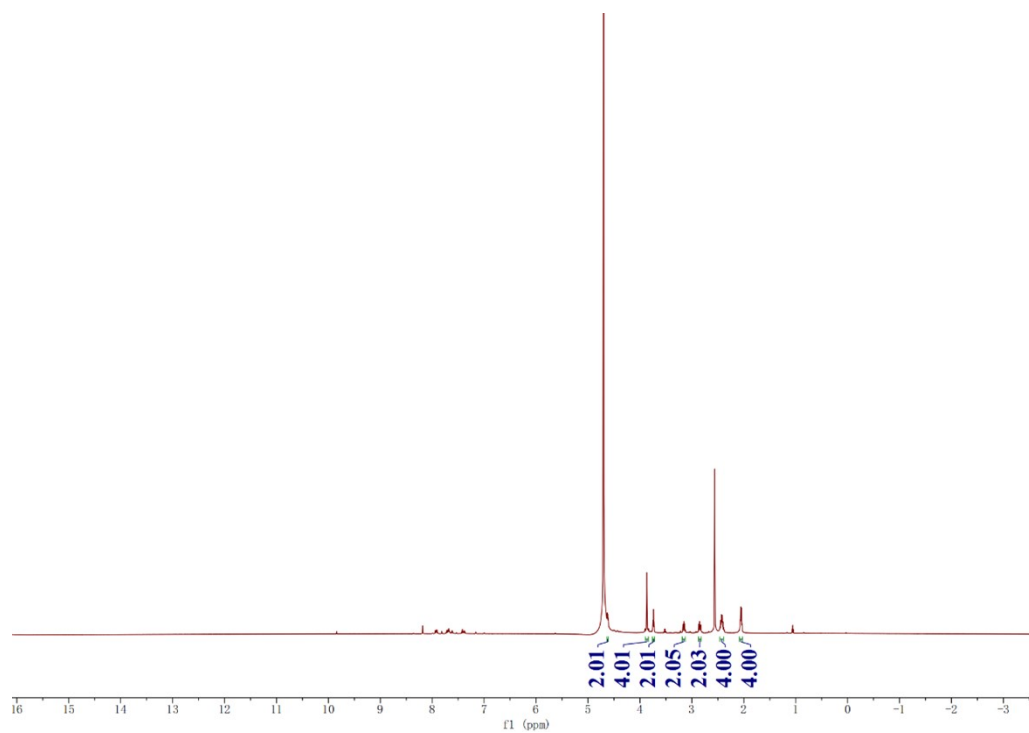

**Figure S28.** <sup>1</sup>H NMR (600MHz) spectrum of the reaction of **C3** with GSH (1:5 proportion of DMSO-*d*<sub>6</sub> and D<sub>2</sub>O).

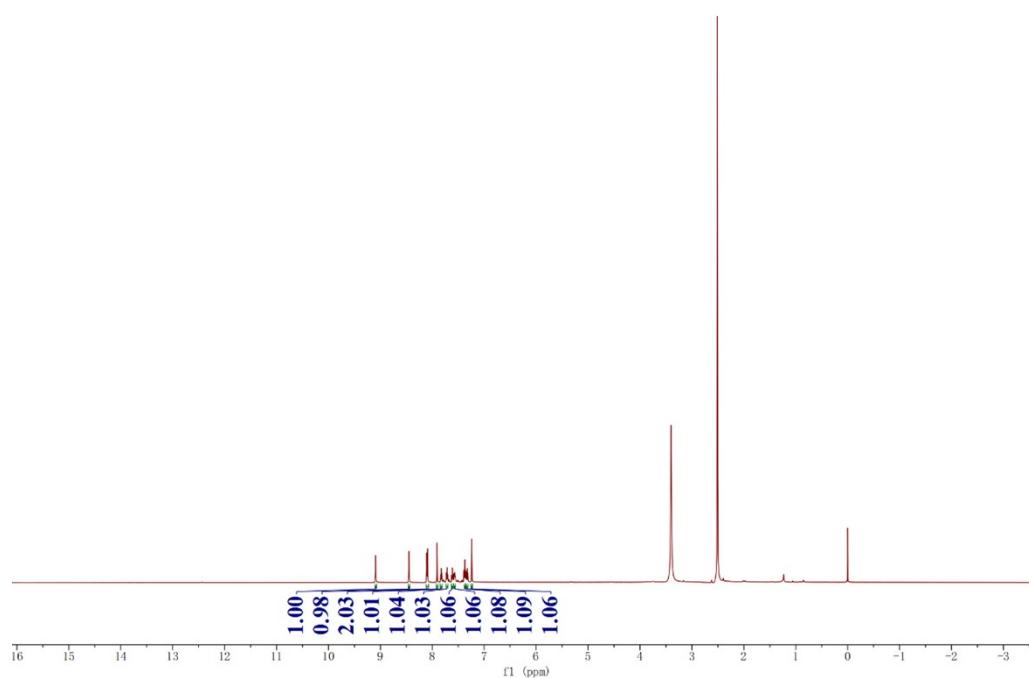

**Figure S29.** <sup>1</sup>H NMR (600MHz) spectrum of the reaction of **C3** with GSH (60:1 proportion of DMSO-*d*<sub>6</sub> and D<sub>2</sub>O).

### Crystal data of C1–C3

**Table S1.** A summary of crystallographic data of **C1**, **C2** and **C3**

|                                    | <b>C1</b>                                                                                      | <b>C2</b>                                                                                      | <b>C3</b>                                                                                      |
|------------------------------------|------------------------------------------------------------------------------------------------|------------------------------------------------------------------------------------------------|------------------------------------------------------------------------------------------------|
| Empirical formula                  | C <sub>44</sub> H <sub>24</sub> Cl <sub>4</sub> CuF <sub>2</sub> N <sub>4</sub> O <sub>2</sub> | C <sub>44</sub> H <sub>24</sub> Cl <sub>4</sub> CuF <sub>2</sub> N <sub>4</sub> O <sub>2</sub> | C <sub>46</sub> H <sub>32</sub> Cl <sub>4</sub> CuF <sub>2</sub> N <sub>4</sub> O <sub>2</sub> |
| Formula weight                     | 884.01                                                                                         | 884.01                                                                                         | 948.09                                                                                         |
| Crystal system                     | Monoclinic                                                                                     | Monoclinic                                                                                     | Monoclinic                                                                                     |
| Space group                        | <i>P2<sub>1</sub>/n</i>                                                                        | <i>C2/c</i>                                                                                    | <i>C2/c</i>                                                                                    |
| a/Å                                | 10.0633 (1)                                                                                    | 19.6802 (6)                                                                                    | 24.3709 (2)                                                                                    |
| b/Å                                | 19.9246 (1)                                                                                    | 9.9152 (2)                                                                                     | 11.5828 (1)                                                                                    |
| c/Å                                | 10.1296 (1)                                                                                    | 20.2125 (6)                                                                                    | 15.5789 (1)                                                                                    |
| α/°                                | 90                                                                                             | 90                                                                                             | 90                                                                                             |
| β/°                                | 110.210 (1)                                                                                    | 94.951 (3)                                                                                     | 102.622 (1)                                                                                    |
| γ/°                                | 90                                                                                             | 90                                                                                             | 90                                                                                             |
| Volume/Å <sup>3</sup>              | 1906.01 (3)                                                                                    | 3929.39 (19)                                                                                   | 4291.38 (6)                                                                                    |
| Z                                  | 2                                                                                              | 4                                                                                              | 4                                                                                              |
| ρ <sub>calc</sub> /cm <sup>3</sup> | 1.540                                                                                          | 1.494                                                                                          | 1.467                                                                                          |
| μ/mm <sup>-1</sup>                 | 3.85                                                                                           | 0.88                                                                                           | 3.49                                                                                           |
| F(000)                             | 894                                                                                            | 1788                                                                                           | 1932                                                                                           |
| CCDC                               | 2115672                                                                                        | 2115673                                                                                        | 2115674                                                                                        |

**Table S2** Selected bond lengths[Å] and angles [°] of **C1**, **C2** and **C3**

|                                      | <b>C1</b>   | <b>C2</b>   | <b>C3</b>   |
|--------------------------------------|-------------|-------------|-------------|
| Cu1—O1 <sup>i</sup>                  | 1.9112 (11) | 1.8933 (13) | 1.9003 (11) |
| Cu1—O1                               | 1.9113 (11) | 1.8933 (13) | 1.9002 (11) |
| Cu1—N1 <sup>i</sup>                  | 1.9692 (13) | 1.9941 (16) | 1.9904 (13) |
| Cu1—N1                               | 1.9692 (13) | 1.9941 (16) | 1.9903 (13) |
| O1 <sup>i</sup> —Cu1—O1              | 180.0       | 180.0       | 88.53 (7)   |
| O1—Cu1—N1 <sup>i</sup>               | 89.19 (5)   | 91.15 (6)   | 149.69 (6)  |
| O1—Cu1—N1                            | 90.81 (5)   | 88.85 (6)   | 93.19 (5)   |
| O1 <sup>i</sup> —Cu1—N1 <sup>i</sup> | 90.81 (5)   | 88.85 (6)   | 93.18 (5)   |
| O1 <sup>i</sup> —Cu1—N1              | 89.18 (5)   | 91.15 (6)   | 149.69 (6)  |
| N1 <sup>i</sup> —Cu1—N1              | 180.0       | 180.0       | 100.18 (8)  |
